# Supplementary material
Source: Springer Nature journal article supplement (https://www.springermedizin.de/resource/supplementary/13550_2012_111_MOESM5_ESM.pdf/9687562)

model:  $K_1 = f \cdot (1 - \exp(-PS/f))$

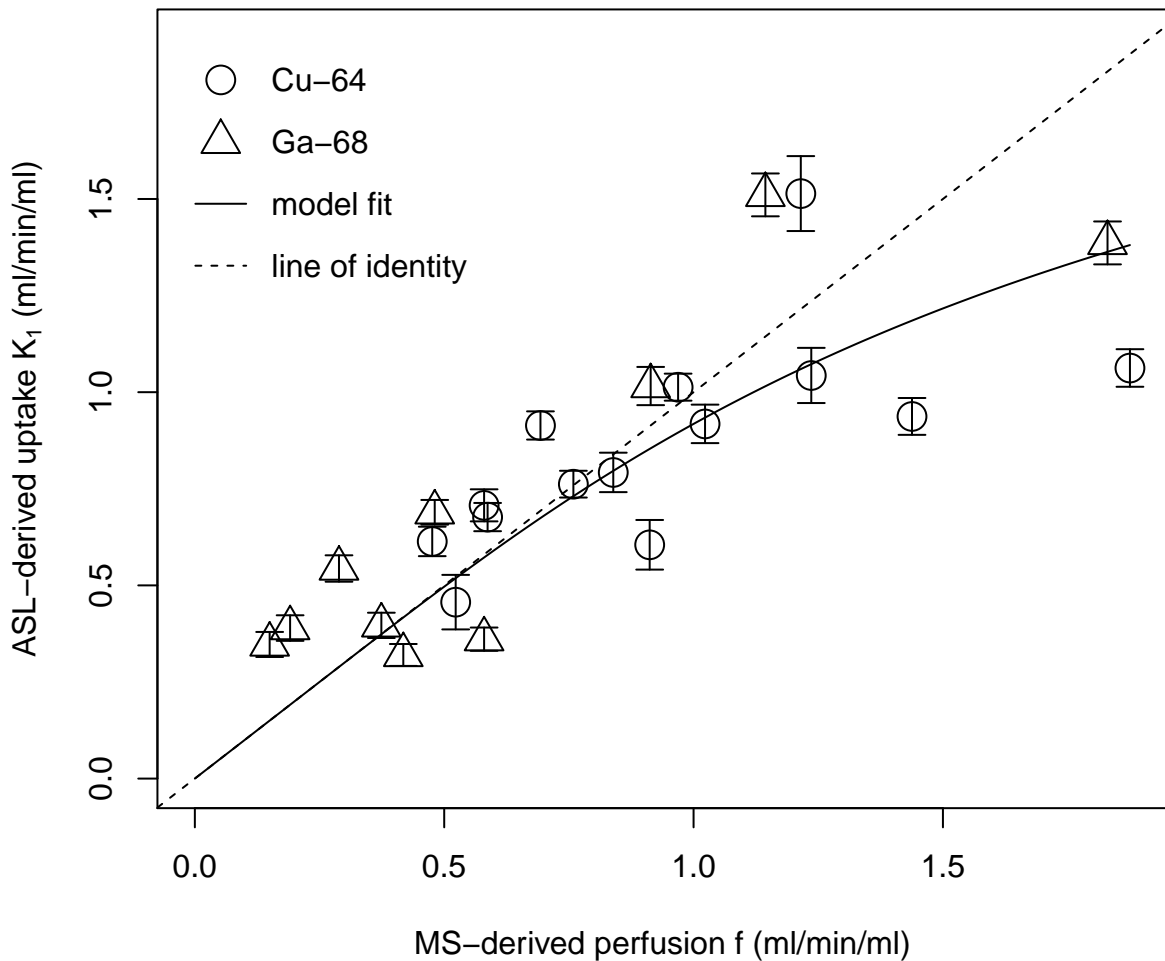

model:  $K_1 = N \cdot f \cdot (1 - \exp(-PS/f))$

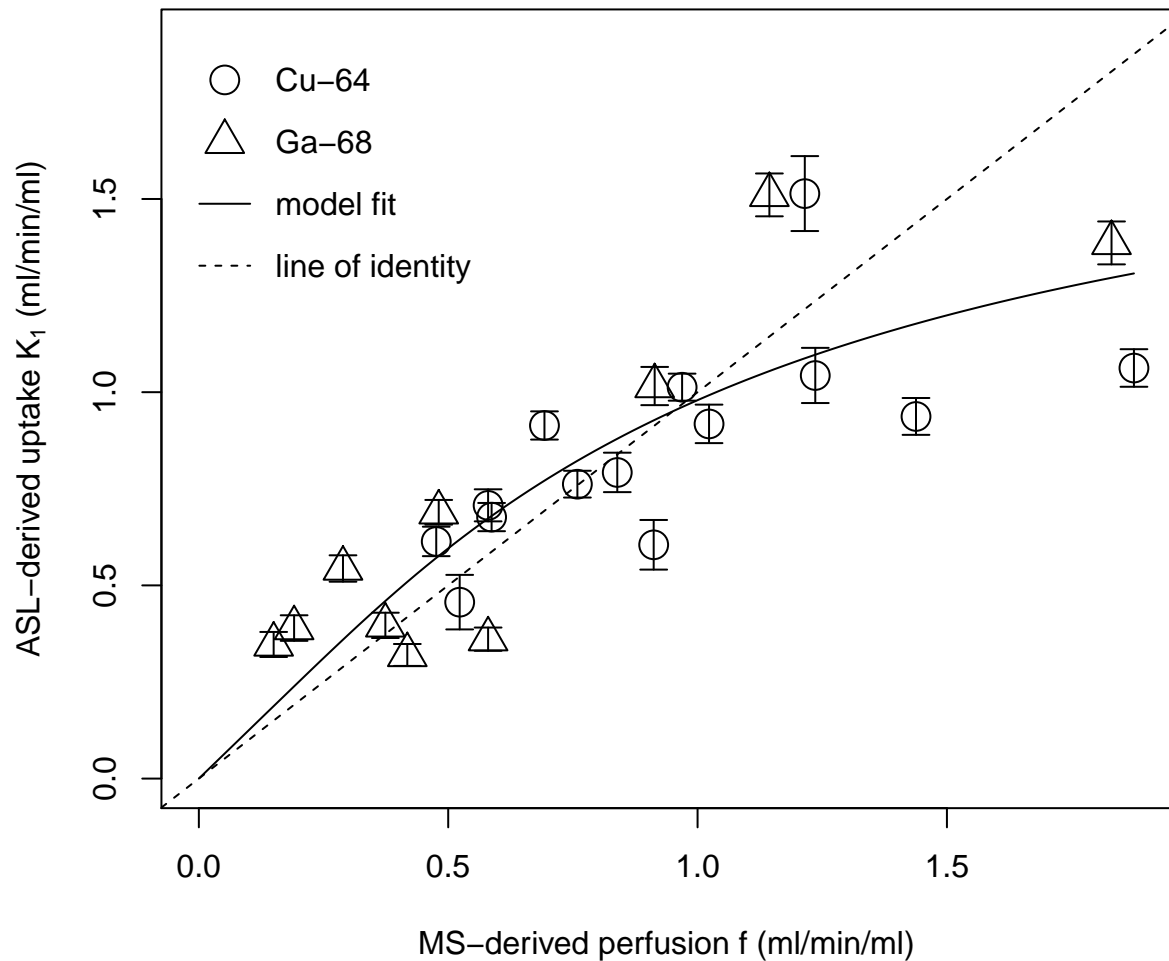

Supplement: MOESM5 [file 9687562]
